# Supplementary material for: Microstructural deformation observed by Mueller polarimetry during traction assay on myocardium samples
Source: PubMed Central journal article supplement (PMC7688642; doi:10.1038/s41598-020-76820-w), 2020-11-25
Supplement: 41598_2020_76820_MOESM1_ESM.pdf [file 41598_2020_76820_MOESM1_ESM.pdf]

## Supporting Information

### **Microstructural deformation observed by Mueller Polarimetry during traction assay on myocardium samples**

*Nicole Tueni<sup>1,2,+</sup>, Jérémy Vizet<sup>3,+</sup>, Martin Genet<sup>1,2</sup>, Angelo Pierangelo<sup>3</sup>, Jean-Marc Allain<sup>1,2,\*</sup>*

\*Corresponding Author: [angelo.pierangelo@polytechnique.edu](mailto:angelo.pierangelo@polytechnique.edu) ;

[jean-marc.allain@polytechnique.edu](mailto:jean-marc.allain@polytechnique.edu)

+These authors contributed equally to this work.

<sup>1</sup> LMS, CNRS, École Polytechnique, Institut Polytechnique de Paris, Palaiseau, France

<sup>2</sup> Inria, Palaiseau, France

<sup>3</sup> LPICM, CNRS, École Polytechnique, Institut Polytechnique de Paris, Palaiseau, France

**Supplementary figure 1:**

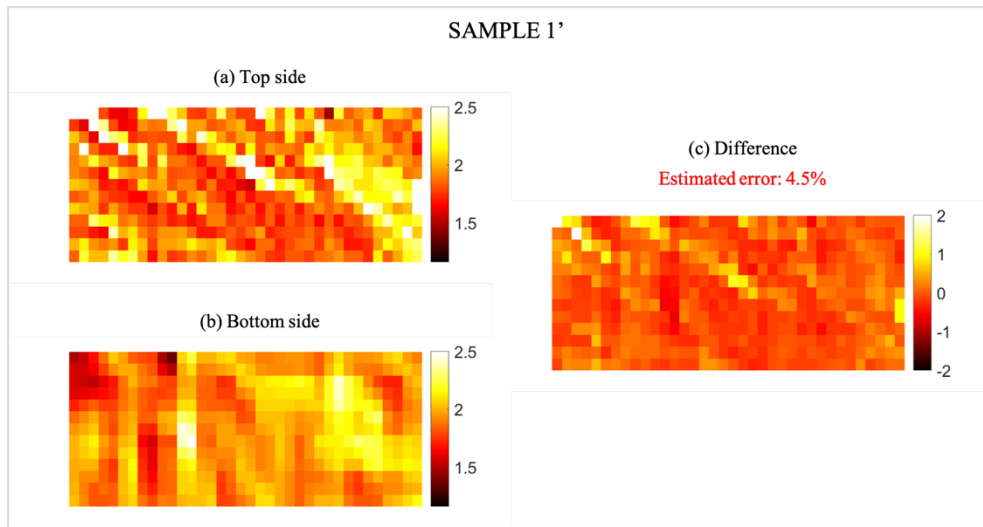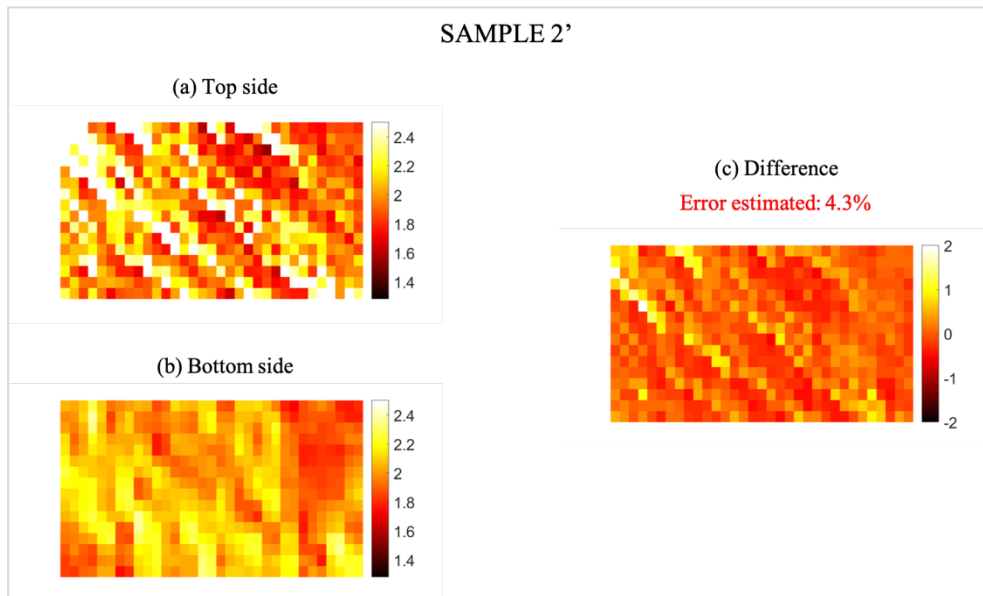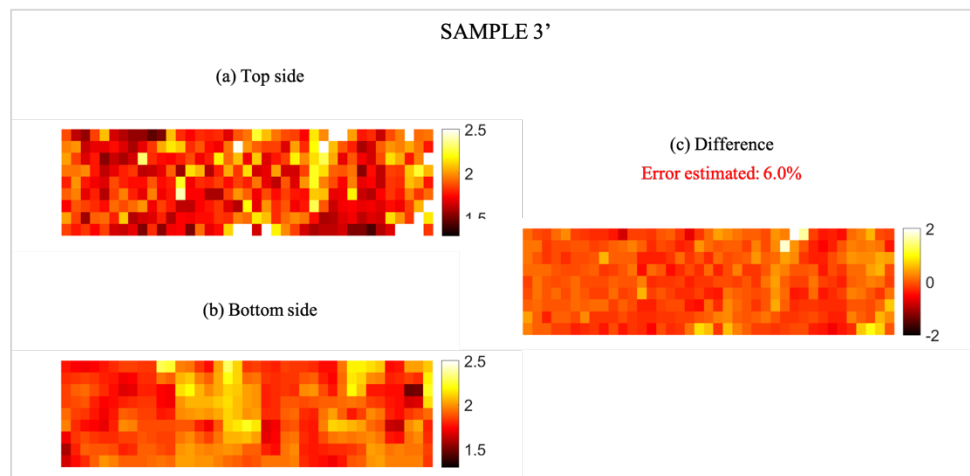

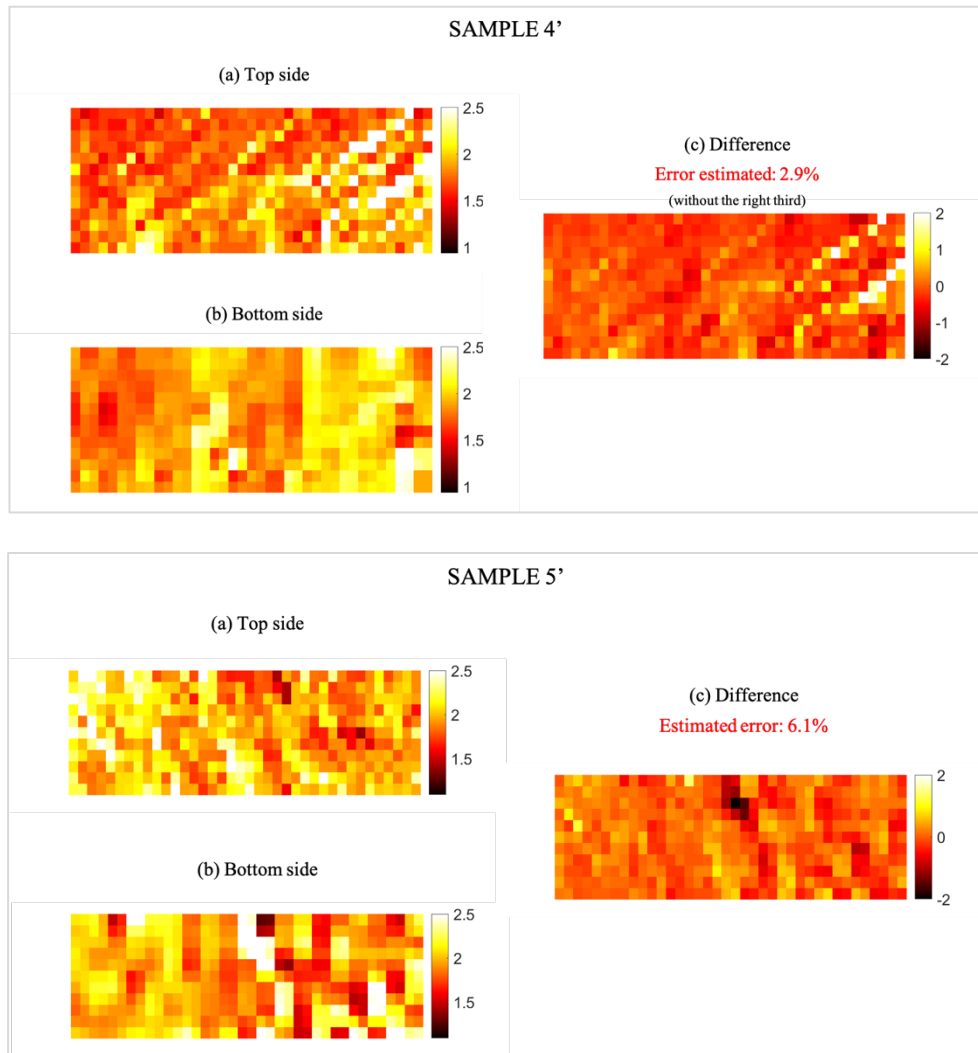

**Figure S1.** Comparison of the stretch measured by DIC on both sides of the same sample. (a) top and (b) bottom measures of each sample. (c) Difference  $C_{top} - C_{bottom}$  of the two measures, as well as the estimation of error on the stretch based on the standard deviation of this difference.

**Supplementary figure 2:**

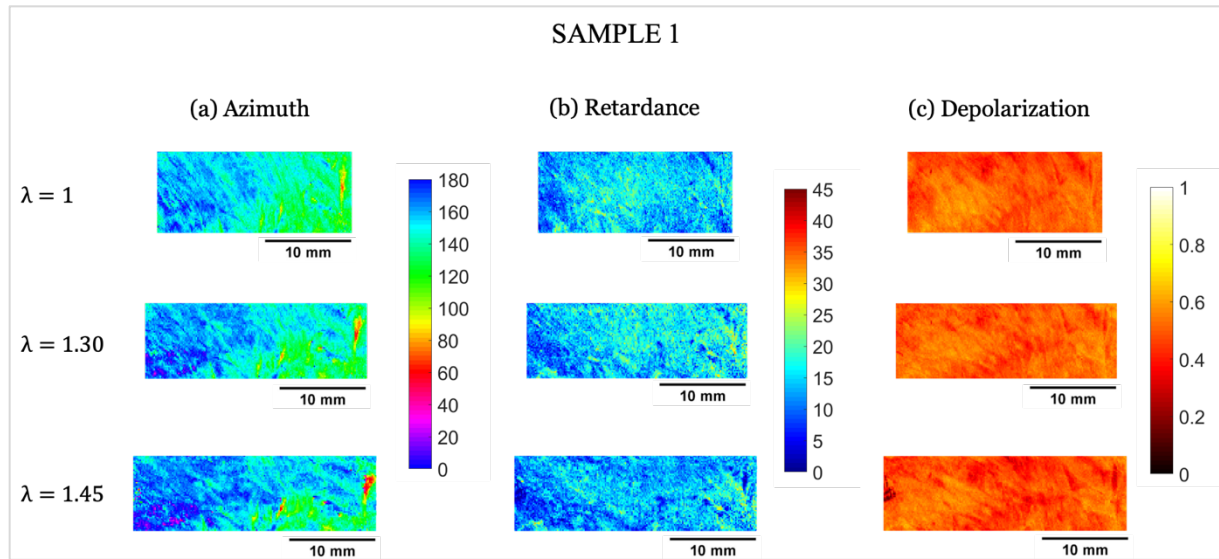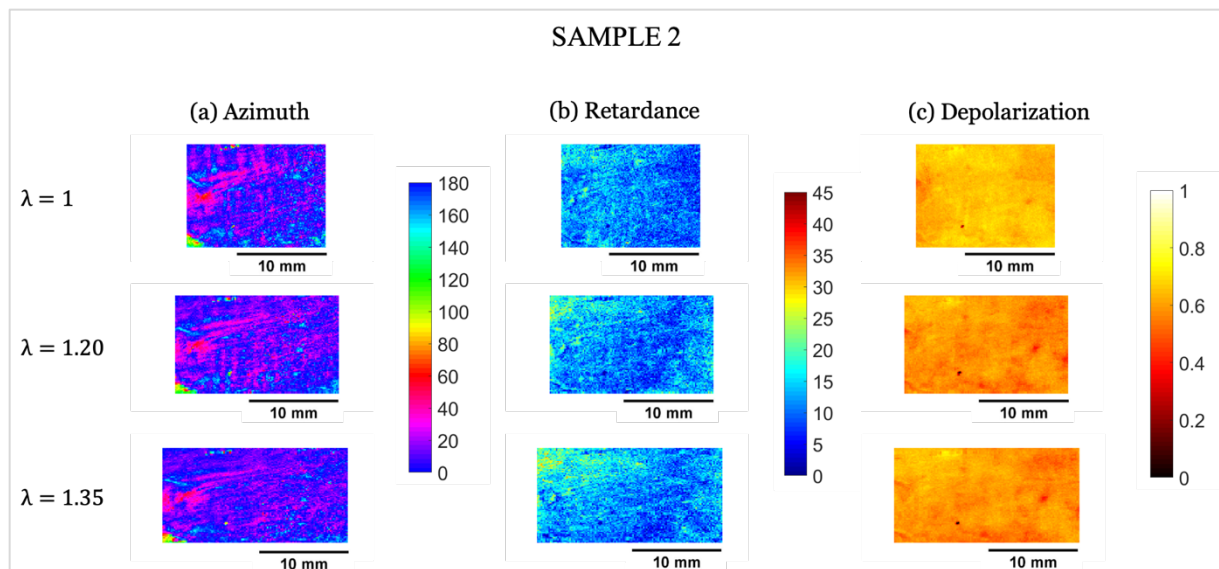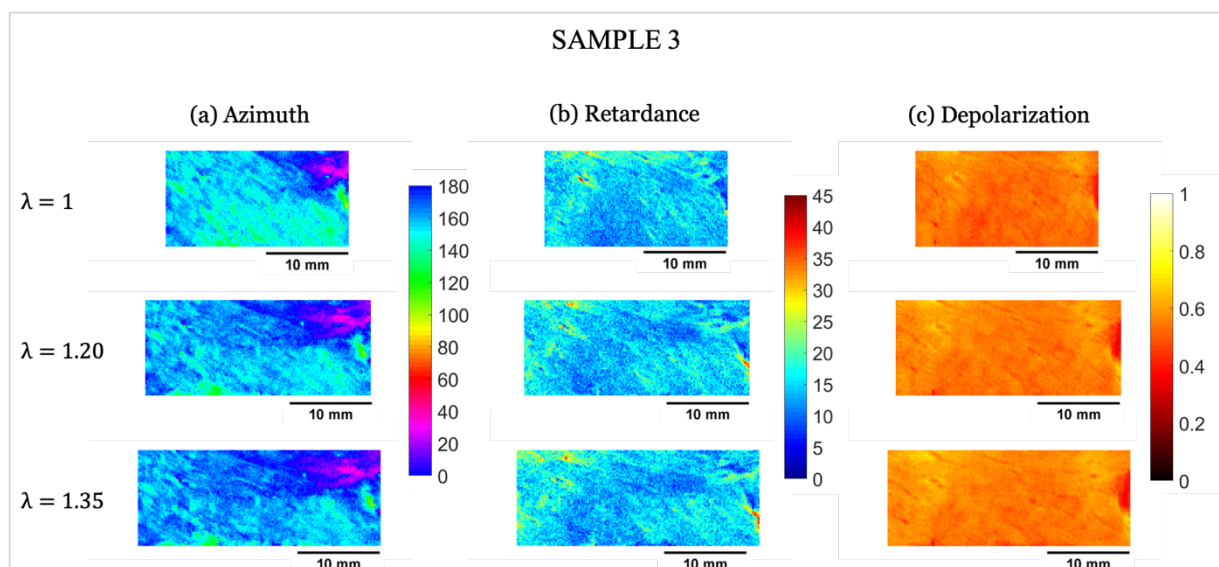

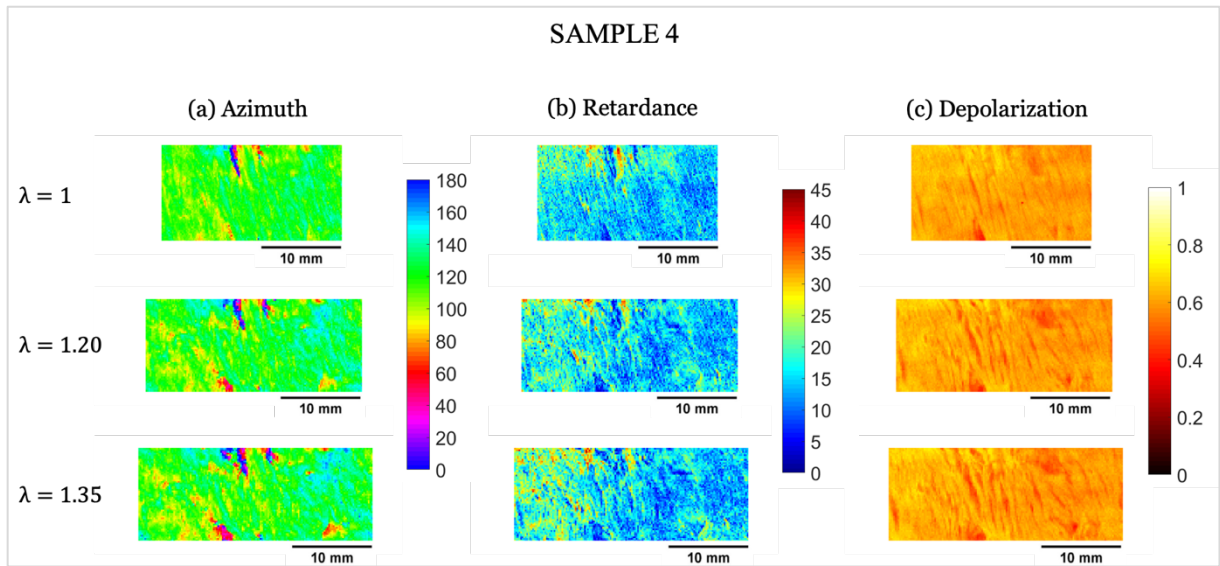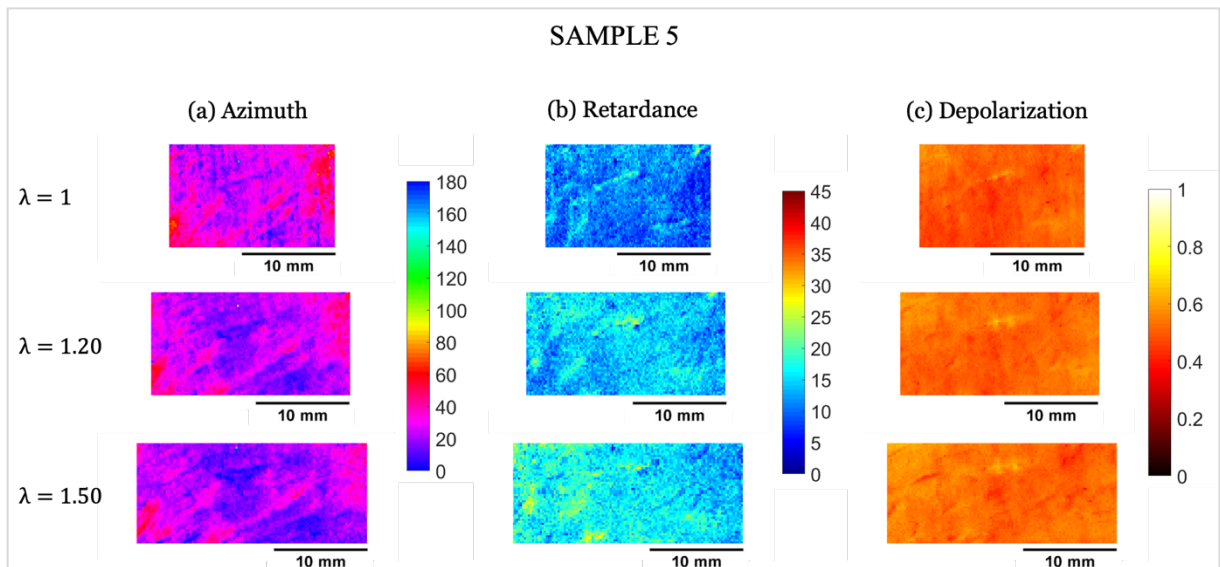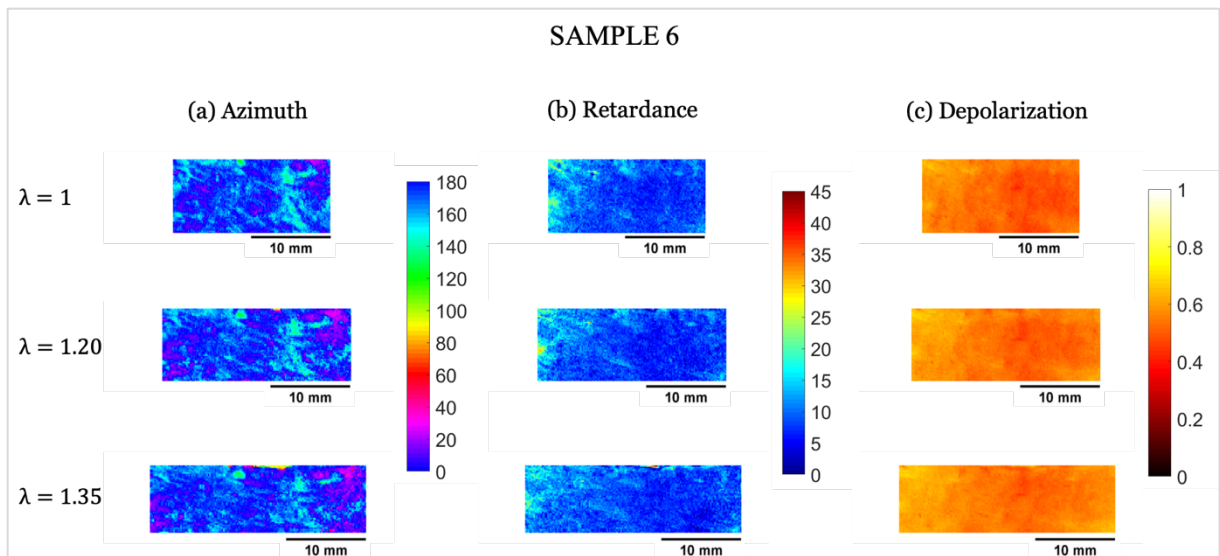

### SAMPLE 7

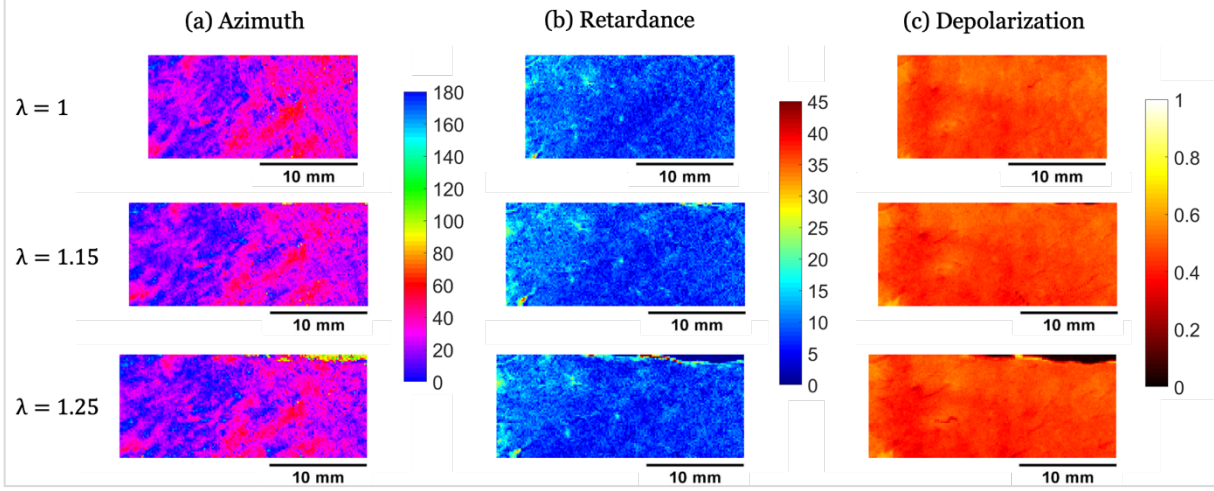

### SAMPLE 8

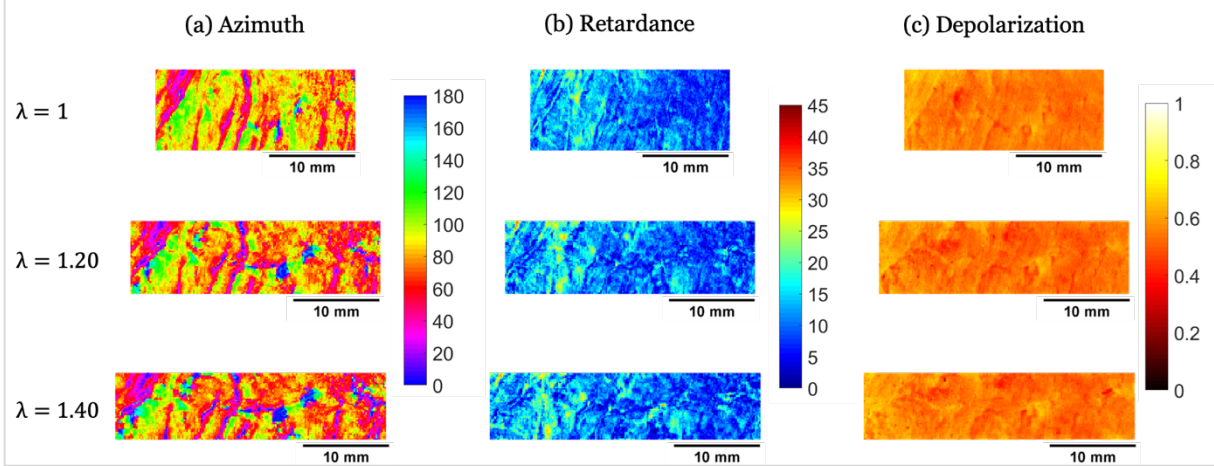

### SAMPLE 9

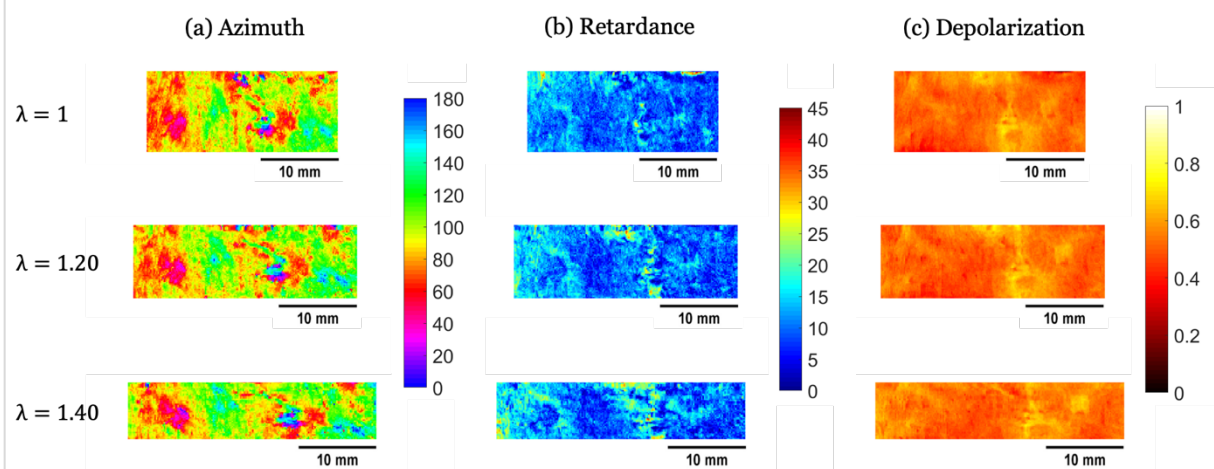

**Figure S2.** Maps of the Mueller polarimetry parameters (a - Azimuth (in  $^{\circ}$ ), b - Retardance (in  $^{\circ}$ ), c - Depolarization) measured at the different imposed stretches (indicated on the left), for all the samples.

**Supplementary figure 3:**

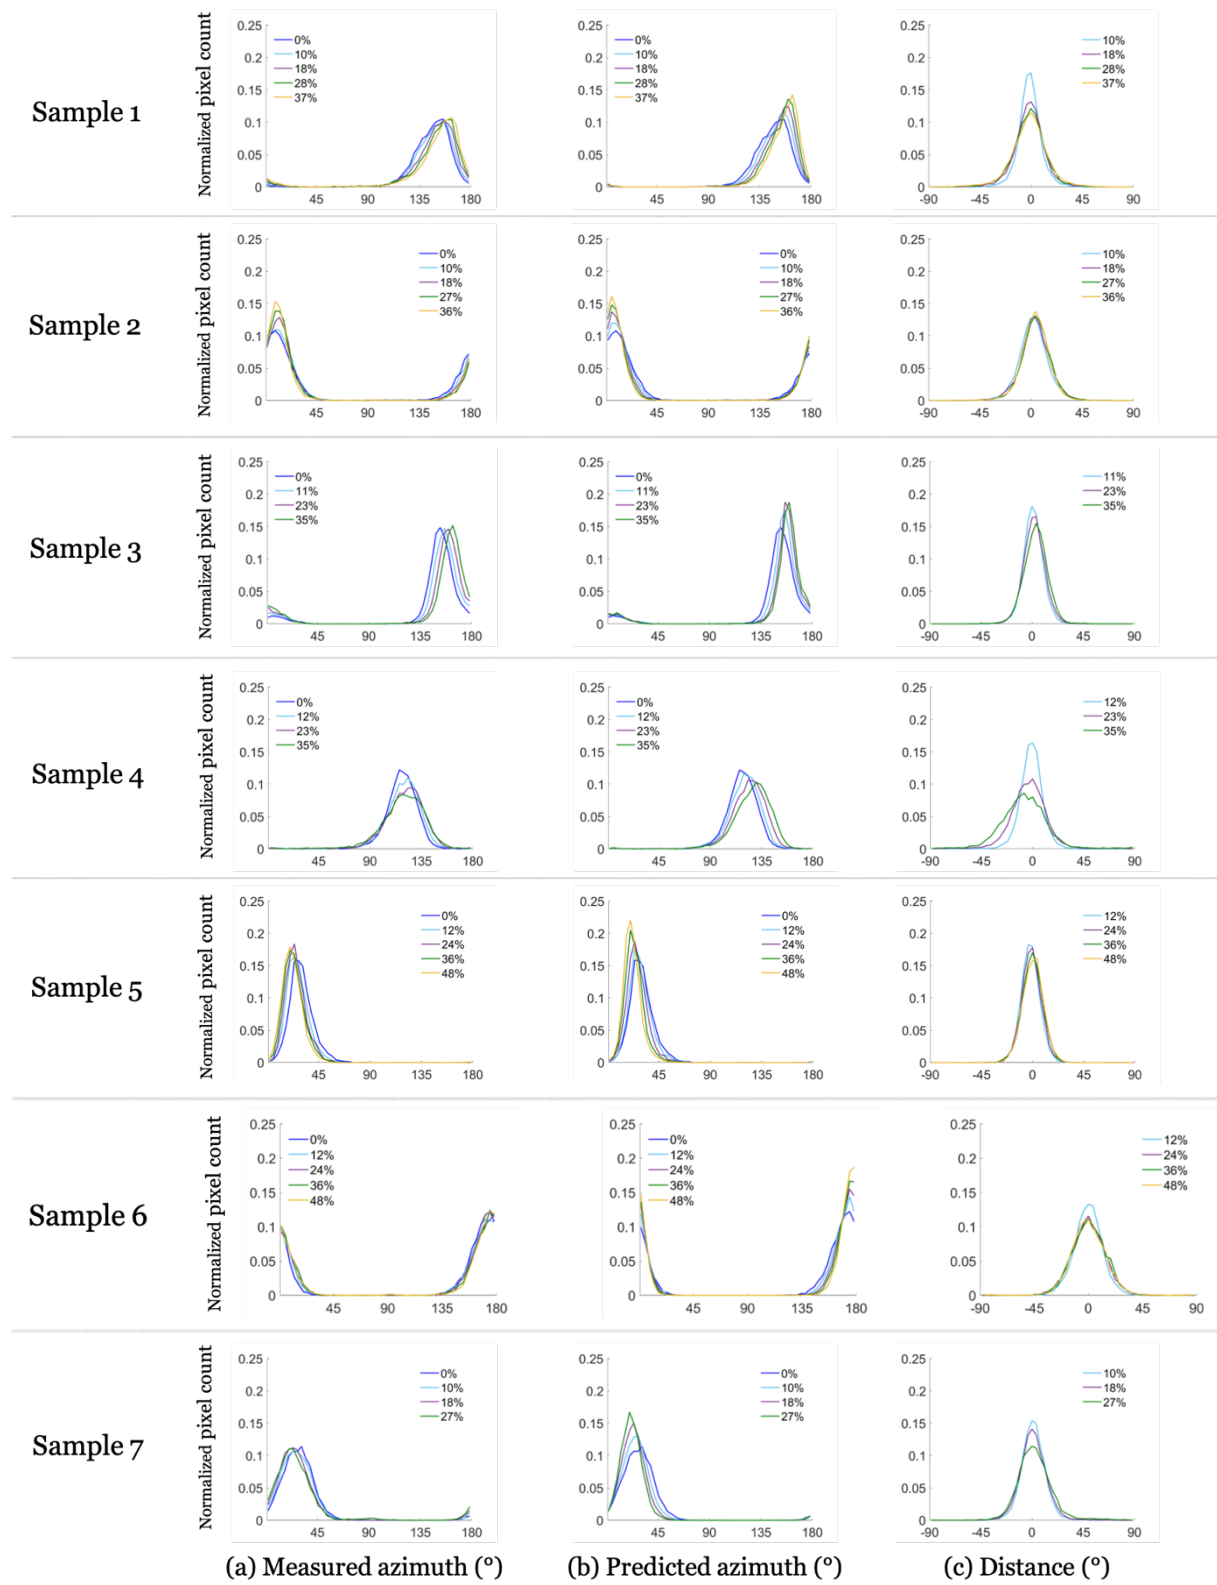

(a) Measured azimuth (°)

(b) Predicted azimuth (°)

(c) Distance (°)



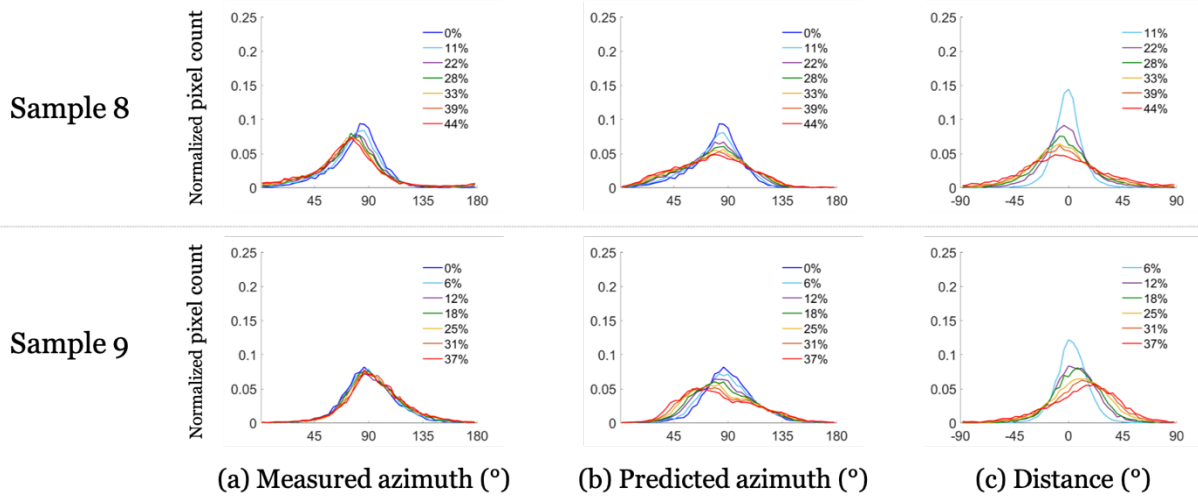

**Figure S3.** Histogram of the polarimetric parameters at different stretch level for each sample. a - Measured azimuth, b - Predicted azimuth, and c - Angular difference between measured and predicted azimuth distributions for each sample. The predicted distributions are obtained using the affine assumption.
